# Supplementary material
Source: PubMed Central journal article supplement (PMC5501754)
Supplement: NIHMS846982-supplement-1.pdf [file NIHMS846982-supplement-1.pdf]

**Supplemental Figures, Legends and Tables for:**

**EGFR-mediated Macrophage Activation Promotes Colitis-associated Tumorigenesis**

Dana M. Hardbower<sup>1,2</sup>, Lori A. Coburn<sup>2,4,6</sup>, Mohammad Asim<sup>2</sup>, Kshipra Singh<sup>2</sup>, Johanna C. Sierra<sup>2</sup>,  
Daniel P. Barry<sup>2</sup>, Alain P. Gobert<sup>2,4</sup>, M. Blanca Piazuelo<sup>2,4</sup>, M. Kay Washington<sup>1</sup>,  
and Keith T. Wilson<sup>1,2,3,4,5,6\*</sup>

<sup>1</sup>Department of Pathology, Microbiology and Immunology; Vanderbilt University Medical Center; Nashville, TN, USA

<sup>2</sup>Division of Gastroenterology, Hepatology and Nutrition, Department of Medicine; Vanderbilt University Medical Center; Nashville, TN, USA

<sup>3</sup>Department of Cancer Biology; Vanderbilt University Medical Center; Nashville, TN, USA

<sup>4</sup>Center for Mucosal Inflammation and Cancer, Vanderbilt University Medical Center; Nashville, TN, USA

<sup>5</sup>Vanderbilt Ingram Cancer Center; Vanderbilt University Medical Center; Nashville, TN, USA

<sup>6</sup>Veterans Affairs Tennessee Valley Healthcare System; Nashville, TN, USA

**\*CORRESPONDING AUTHOR**

Keith T. Wilson, MD

2215 Garland Avenue

1030C Medical Research Building IV

Nashville, TN 37232

Phone: 615-343-5675

Email: keith.wilson@vanderbilt.edu

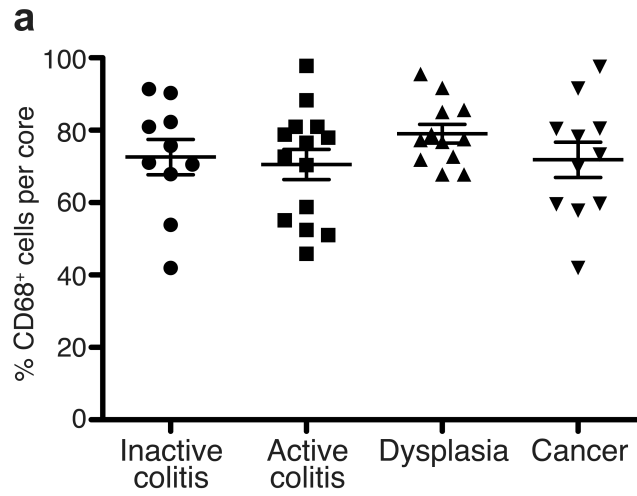

**Supplementary Figure 1. Percentages of macrophages in human CAC TMA.** (a) Quantification of the percentage of CD68<sup>+</sup> cells among the total number of nuclei in each individual core in the TMA. For (a-c),  $n = 10$  inactive colitis (normal or quiescent histology) samples, 14 active colitis (mild, moderate or severe histology) samples, 12 dysplasia samples, and 11 colorectal cancer samples.

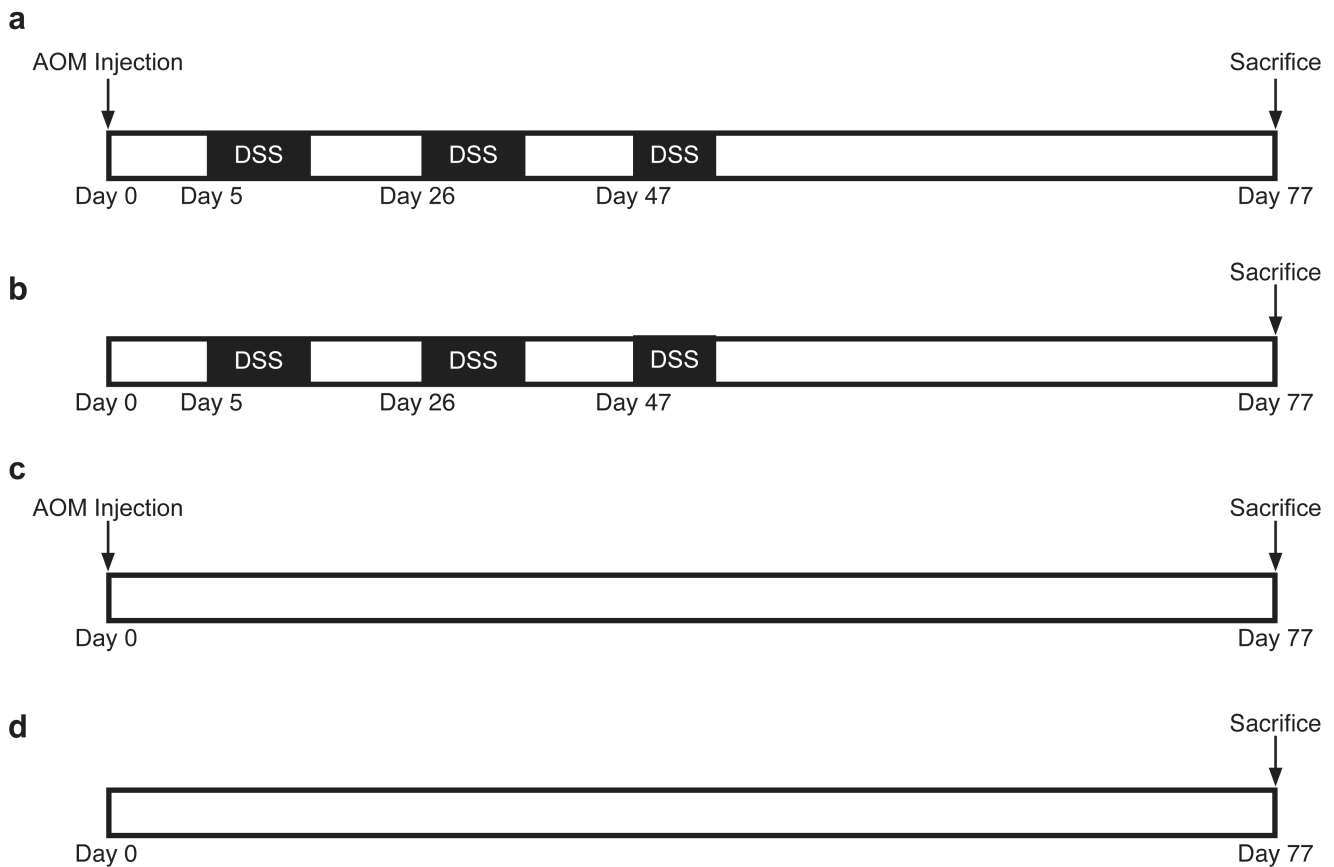

**Supplementary Figure 2. Schematic of the AOM-DSS protocol utilized in these studies.** (a) AOM-DSS group: Mice were injected with 12.5 mg/kg AOM on Day 0. Animals then received 3 cycles of 4% DSS beginning on Day 5 (for 5 days), Day 26 (for 5 days), and Day 47 (for 4 days). Mice were sacrificed on Day 77 post-AOM injection. (b) DSS only group: Mice did not receive an AOM injection, but received 3 cycles of 4% DSS as in the AOM-DSS group. Mice were sacrificed on Day 77. (c) AOM only group: Mice were injected with 12.5 mg/kg AOM on Day 0 and were then maintained on normal drinking water throughout the protocol. Mice were sacrificed on Day 77 post-AOM injection. (d) Control group: Mice did not receive an AOM injection nor did mice receive DSS in their drinking water. Mice were sacrificed on Day 77.

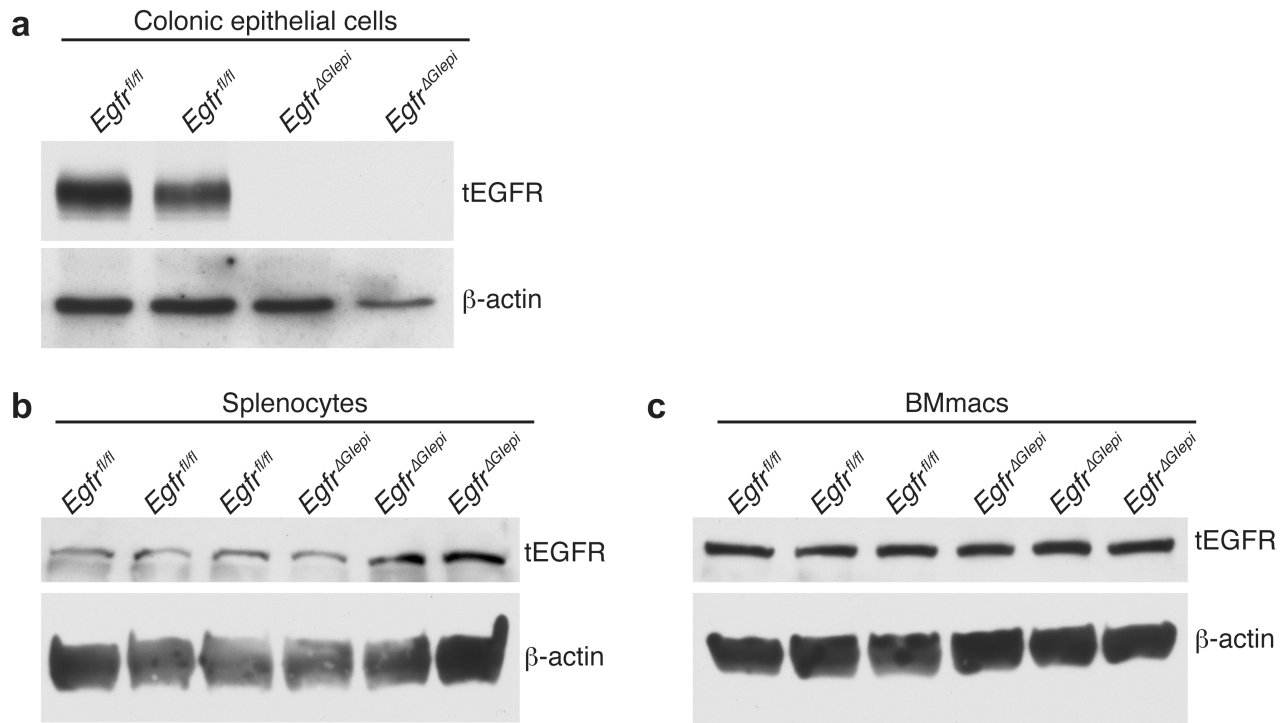

**Supplementary Figure 3. *Egfr*<sup>ΔGlepi</sup> colonic epithelial cells demonstrated tEGFR knockout, but splenocytes and bone marrow-derived macrophages did not.** (a) Representative Western blot of tEGFR levels in colonic epithelial cells from naïve *Egfr*<sup>fl/fl</sup> and *Egfr*<sup>ΔGlepi</sup> mice. (b) Representative Western blot of tEGFR levels in splenocytes from naïve *Egfr*<sup>fl/fl</sup> and *Egfr*<sup>ΔGlepi</sup> mice. (c) Representative Western blot of tEGFR levels in bone marrow-derived macrophages (BMmacs) from naïve *Egfr*<sup>fl/fl</sup> and *Egfr*<sup>ΔGlepi</sup> mice.



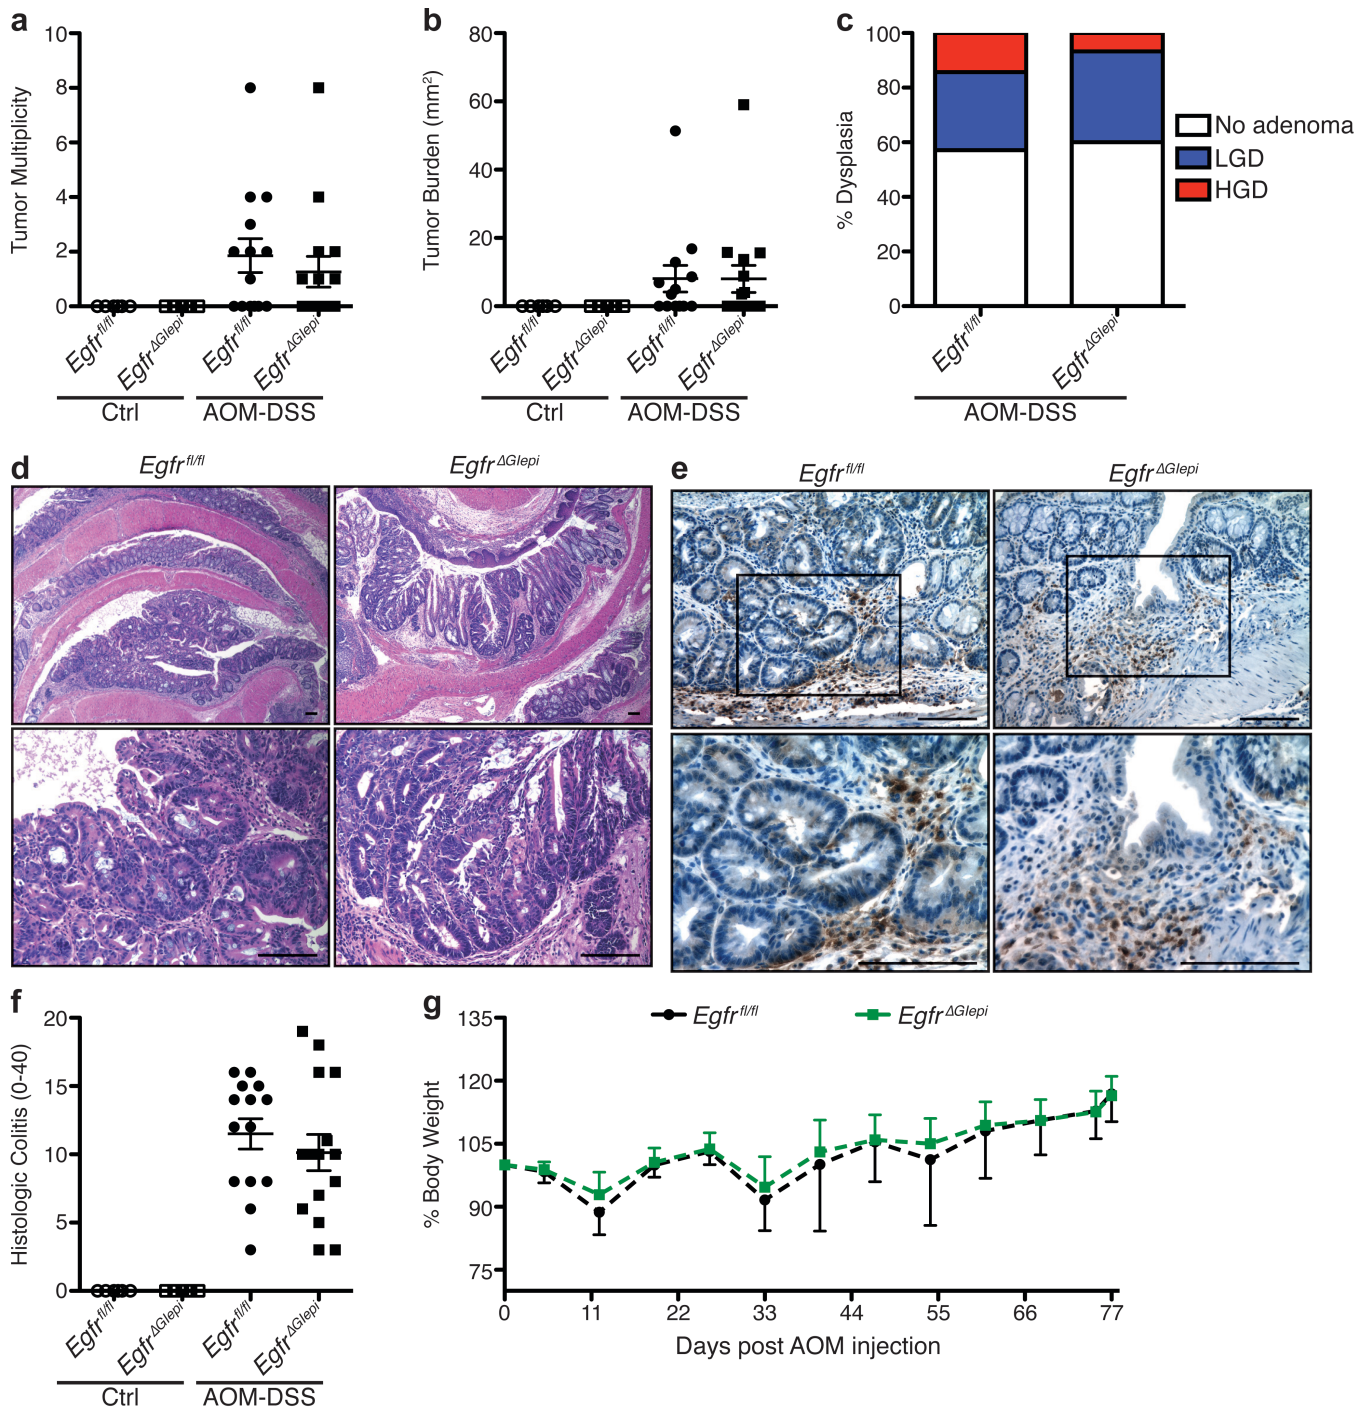

**Supplementary Figure 4. *Egfr<sup>ΔGlepi</sup>* mice did not demonstrate altered tumorigenesis compared to *Egfr<sup>fl/fl</sup>* mice.** (a) Tumor multiplicity was assessed by gross visual inspection, utilizing a dissecting microscope. (b) Tumor burden was determined by the addition of the calculated area of each identified tumor, as assessed with an electronic caliper for both length and width. (c) Percentage of cases with either no adenoma, low-grade dysplasia (LGD), and high-grade dysplasia (HGD) was determined by a gastrointestinal pathologist (M.K.W.) in a blinded manner. (d) Representative H&E-stained images from AOM-DSS-treated mice. Scale bars = 100 μm. (e) Representative immunoperoxidase images of pEGFR Y1068 from mice in (a-f). Scale bars = 50 μm. *n* = 6 mice per genotype assessed. (f) Histologic colitis was determined by M.K.W. in a blinded manner. (g) Percentage of initial body weight was assessed at indicated time points. In (a-c) and (f-g), *n* = 6 control and 14-15 AOM-DSS treated mice per genotype.

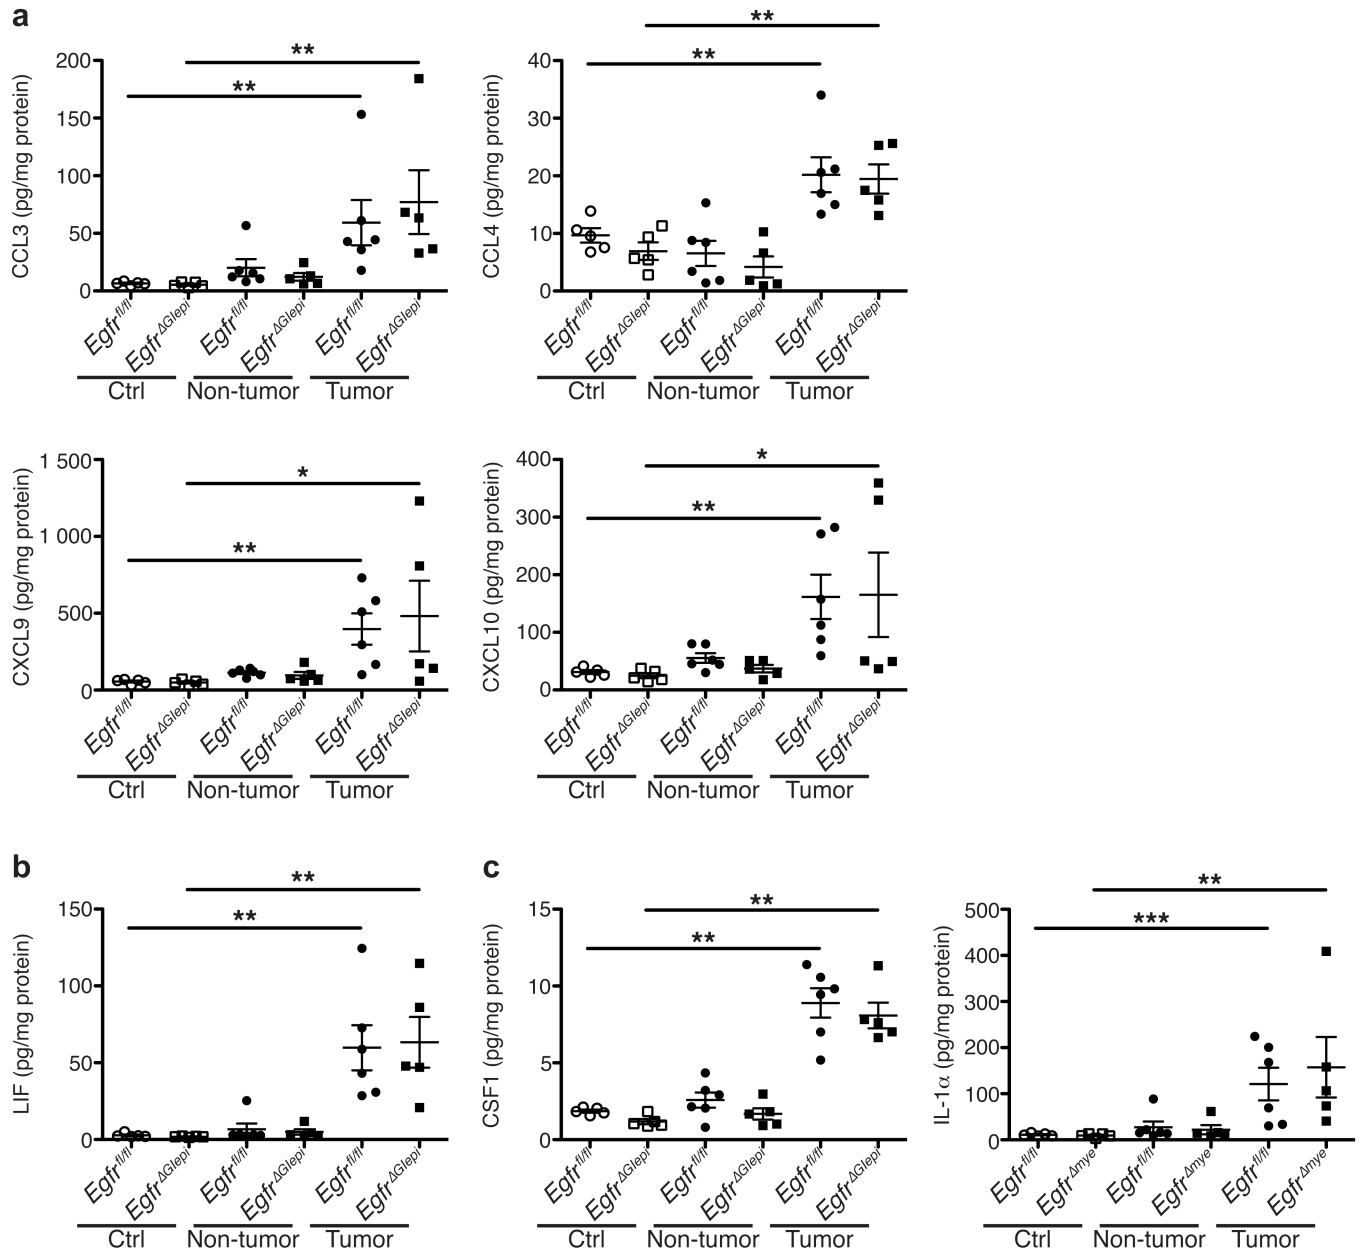

**Supplementary Figure 5. *Egfr<sup>ΔGlepi</sup>* mice demonstrate no alterations in cytokine and chemokine production within tumors.** (a) Protein levels of the general C-C motif and C-X-C motif chemokines CCL3 (MIP-1 $\alpha$ ), CCL4 (MIP-1 $\beta$ ), CXCL9 (MIG), and CXCL10 (IP-10) were assessed by Luminex Multiplex Array from colonic tissues 77 days post-AOM injection. (b) Protein levels of the pleiotropic cytokine, LIF, were assessed by Luminex Multiplex Array from colonic tissues 77 days post-AOM injection. (c) Protein levels of cytokines produced by activated macrophages, CSF1 (M-CSF) and IL-1 $\alpha$  were assessed by Luminex Multiplex Array from colonic tissues 77 days post-AOM injection. In all panels,  $n = 5$  control tissues and 5-6 tumors with paired non-tumor area per genotype. In all panels,  $*P < 0.05$ ,  $**P < 0.01$ ,  $***P < 0.001$  by one-way ANOVA with Kruskal-Wallis test, followed by Mann-Whitney  $U$  test.

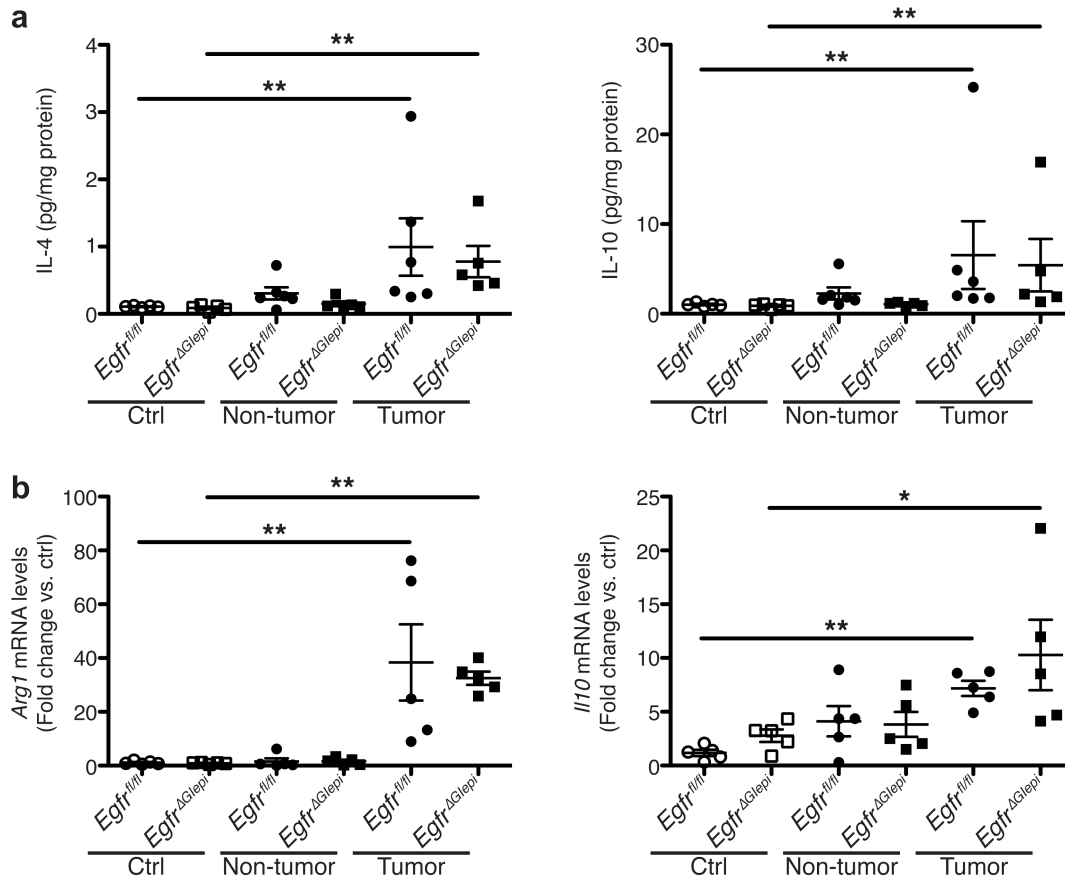

**Supplementary Figure 6 *Egr1<sup>ΔGlepi</sup>* mice demonstrate no alterations in M2 macrophage activation during colon tumorigenesis.** (a) Protein levels of M2 stimuli, IL-4 and IL10, were assessed by Luminex Multiplex Array from colonic tissues 77 days post-AOM injection.  $n = 5$  control tissues and 5-6 tumors with paired non-tumor area per genotype. (b) mRNA levels of M2 markers, *Arg1* and *Il10*, were assessed by qRT-PCR from colonic tissues 77 days post-AOM injection.  $n = 5$  control tissues and 5 tumors with paired non-tumor area per genotype. In all panels,  $*P < 0.05$ ,  $**P < 0.01$  by one-way ANOVA with Kruskal-Wallis test, followed by Mann-Whitney  $U$  test.

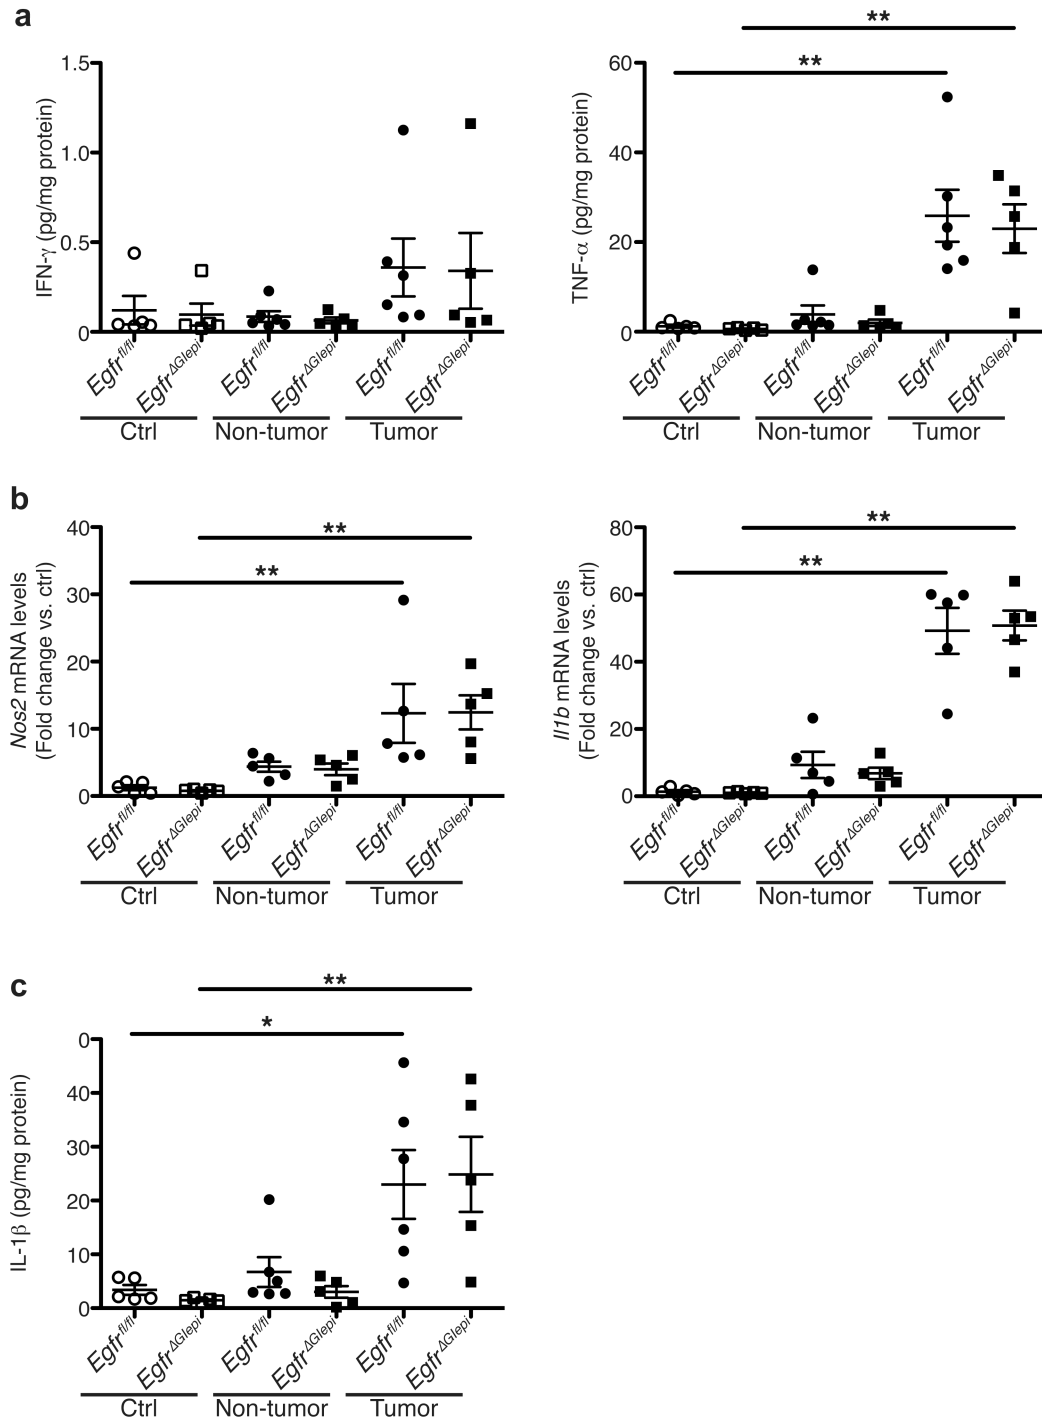

**Supplementary Figure 7. *Egr1<sup>ΔGlepi</sup>* mice demonstrate no alterations in M1 macrophage activation during colon tumorigenesis.** (a) Protein levels of M1 stimuli, IFN- $\gamma$  and TNF- $\alpha$ , were assessed by Luminex Multiplex Array from colonic tissues 77 days post-AOM injection.  $n = 5$  control tissues and 5-6 tumors with paired non-tumor area per genotype. (b) mRNA levels of M1 markers, *Nos2* and *Il1b*, were assessed by qRT-PCR from colonic tissues 77 d post-AOM injection.  $n = 5$  control tissues and 5 tumors with paired non-tumor area per genotype. (c) Protein levels of M1 marker, IL-1 $\beta$ , were assessed by Luminex Multiplex Array from colonic tissues 77 days post-AOM injection.  $n = 5$  control tissues and 5-6 tumors with paired non-tumor area per genotype. In all panels, \* $P < 0.05$ , \*\* $P < 0.01$  by one-way ANOVA with Kruskal-Wallis test, followed by Mann-Whitney  $U$  test.

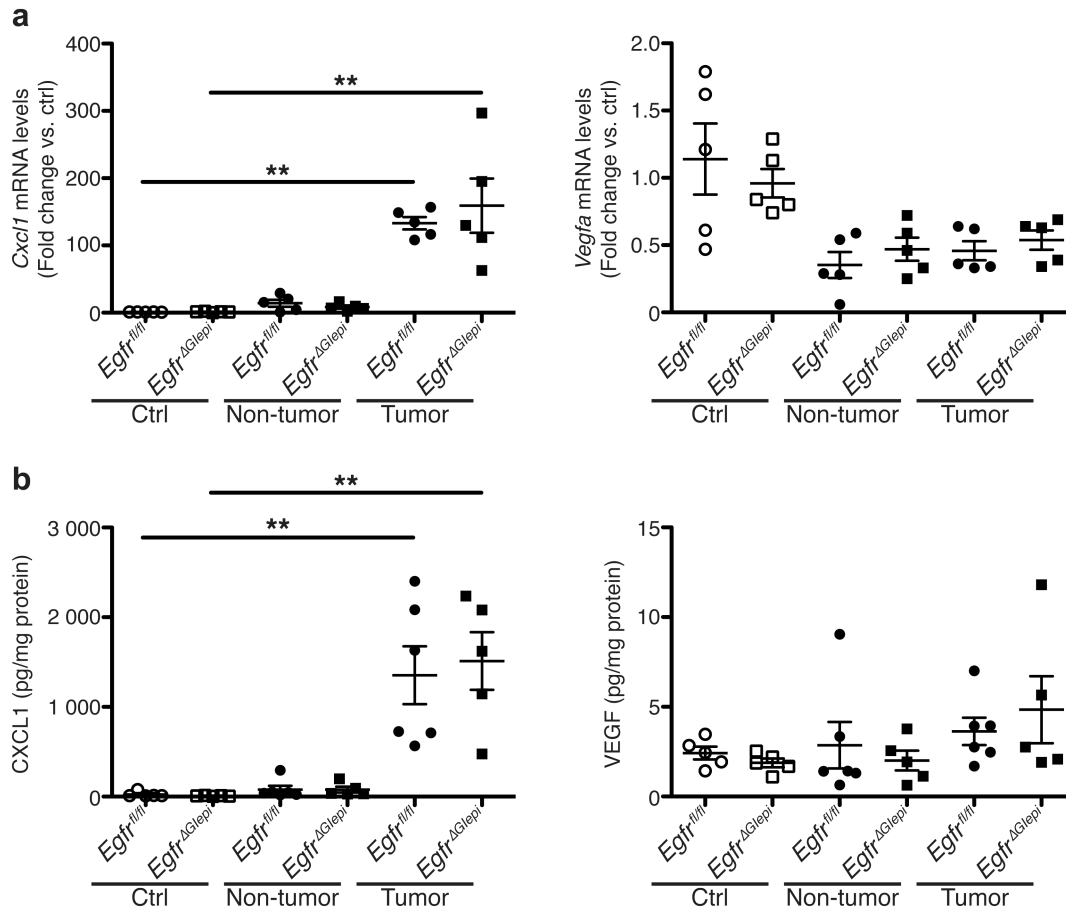

**Supplementary Figure 8. *Egfr<sup>ΔGlepi</sup>* mice demonstrate no alterations in pro-angiogenic chemokine/cytokine production during colon tumorigenesis.** (a) mRNA levels of the pro-angiogenic chemokine, *Cxcl1*, and the pro-angiogenic cytokine, *Vegfa*, were assessed by qRT-PCR from colonic tissues 77 days post-AOM injection.  $n = 5$  control tissues and 5 tumors with paired non-tumor area per genotype. (b) Protein levels of CXCL1 and VEGF were assessed by Luminex Multiplex Array from colonic tissues 77 days post-AOM injection.  $n = 5$  control tissues and 5-6 tumors with paired non-tumor area per genotype. In all panels,  $*P < 0.05$ ,  $**P < 0.01$  by one-way ANOVA with Kruskal-Wallis test, followed by Mann-Whitney  $U$  test.

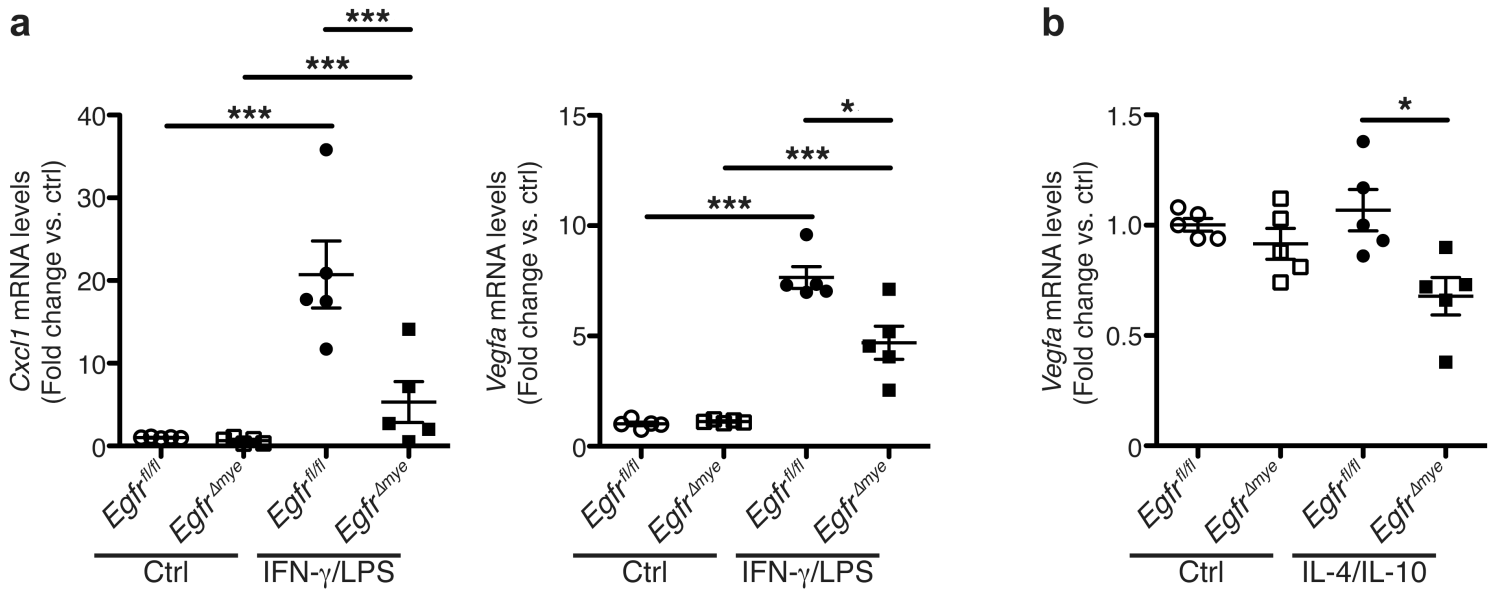

**Supplementary Figure 9. *Egfr<sup>Δmye</sup>* BMmacs demonstrate significant alterations in *Cxcl1* and *Vegfa* mRNA levels during M1 or M2 macrophage activation.** (a) mRNA levels of the pro-angiogenic chemokine, *Cxcl1*, and the pro-angiogenic cytokine, *Vegfa*, were assessed by qRT-PCR in BMmacs 24 h post-stimulation with IFN- $\gamma$  (200 U/mL) and LPS (10 ng/mL).  $n = 5$  biological replicates per genotype. (b) mRNA levels of the pro-angiogenic cytokine, *Vegfa*, were assessed by qRT-PCR in BMmacs 24 h post-stimulation with IL-4 (10 ng/mL) and IL-10 (10 ng/mL).  $n = 5$  biological replicates per genotype. In all panels, \* $P < 0.05$ , \*\*\* $P < 0.001$  by one-way ANOVA with Newman-Keuls post-test.

| Analyte                    | Concentration of Analyte (pg/mg protein); Mean ± S.E.M. |               |                  |                            |               |                 |
|----------------------------|---------------------------------------------------------|---------------|------------------|----------------------------|---------------|-----------------|
|                            | <i>Egfr<sup>fl/fl</sup></i>                             |               |                  | <i>Egfr<sup>Δmye</sup></i> |               |                 |
|                            | Control                                                 | Non-tumor     | AOM-DSS          | Control                    | Non-tumor     | AOM-DSS         |
| CCL2                       | 3.87 ± 0.40                                             | 6.85 ± 1.55   | 113.5 ± 20.32*** | 4.03 ± 1.39                | 1.36 ± 0.88   | 83.90 ± 17.56## |
| CCL5                       | 7.08 ± 1.43                                             | 8.15 ± 2.22   | 2.62 ± 0.45      | 5.04 ± 0.66                | 3.06 ± 0.61   | 0.80 ± 0.11     |
| CCL11                      | 109.6 ± 48.44                                           | 130.8 ± 27.15 | 145.2 ± 36.29    | 134.6 ± 27.05              | 84.97 ± 15.02 | 113.5 ± 44.59   |
| CSF2                       | 0.21 ± 0.88                                             | 0.36 ± 0.15   | 15.65 ± 4.24***  | 0.16 ± 0.68                | 0.20 ± 0.01   | 11.06 ± 2.81#   |
| CSF3                       | 2.71 ± 0.92                                             | 34.29 ± 23.53 | 277.1 ± 108.6**  | 4.45 ± 0.66                | 15.15 ± 3.15  | 366.2 ± 120.0## |
| CXCL2                      | 4.66 ± 0.54                                             | 47.66 ± 13.03 | 2492 ± 507.3***  | 4.15 ± 0.94                | 58.25 ± 27.15 | 1478 ± 340.1### |
| CXCL5                      | 0.04 ± 0.01                                             | 15.83 ± 14.49 | 117.7 ± 56.67**  | 0.04 ± 0.01                | 0.08 ± 0.01   | 10.38 ± 6.65    |
| IL-2                       | 1.15 ± 0.21                                             | 1.30 ± 0.31   | 1.85 ± 0.55      | 0.92 ± 0.15                | 1.94 ± 0.16   | 0.81 ± 0.16§    |
| IL-5                       | 0.95 ± 0.28                                             | 0.84 ± 0.35   | 0.80 ± 0.26      | 0.76 ± 0.27                | 0.42 ± 0.08   | 0.25 ± 0.07     |
| IL-6                       | 1.47 ± 0.68                                             | 3.77 ± 0.95   | 548.4 ± 234.2*** | 1.33 ± 0.48                | 5.94 ± 1.74   | 465.9 ± 119.7## |
| IL-7                       | 2.14 ± 0.20                                             | 2.34 ± 0.33   | 4.19 ± 0.52*     | 2.20 ± 0.15                | 3.01 ± 0.41   | 1.22 ± 0.39§§§  |
| IL-9                       | 32.41 ± 8.75                                            | 41.05 ± 9.63  | 72.04 ± 19.40    | 22.84 ± 8.14               | 39.38 ± 4.70  | 24.90 ± 2.02§§  |
| IL-12B                     | 2.09 ± 0.30                                             | 1.59 ± 0.40   | 1.92 ± 0.44      | 1.19 ± 0.25                | 2.68 ± 0.15   | 1.77 ± 0.26     |
| IL-15                      | 7.60 ± 1.40                                             | 5.86 ± 2.03   | 3.97 ± 1.06      | 6.32 ± 0.72                | 3.55 ± 0.94   | 1.84 ± 0.51     |
| IL-17                      | 0.64 ± 0.16                                             | 1.79 ± 0.43   | 24.74 ± 5.71***  | 0.45 ± 0.06                | 1.29 ± 0.45   | 18.89 ± 3.26##  |
| Not detected: IL-3, IL-12A |                                                         |               |                  |                            |               |                 |

**Supplementary Table 1. Luminex analytes that did not demonstrate significant differences in colonic tissues from *Egfr<sup>fl/fl</sup>* and *Egfr<sup>Δmye</sup>* mice.** A total of 32 distinct analytes were assessed in colonic tissues from control mice and from tumor and adjacent non-tumor tissues from mice treated with AOM-DSS. Listed are the analytes that were not significantly induced during AOM-DSS treatment, were not relevant to subsequent analyses in the study or demonstrated no significant differences between genotypes.  $n = 5$  control and 6-9 non-tumor/tumor pairs per genotype. \* $P < 0.05$ , \*\* $P < 0.01$ , and \*\*\* $P < 0.001$  versus *Egfr<sup>fl/fl</sup>* control. # $P < 0.05$ , ## $P < 0.01$ , and ### $P < 0.001$  versus *Egfr<sup>Δmye</sup>* control. § $P < 0.05$ , §§ $P < 0.01$ , and §§§ $P < 0.001$  versus *Egfr<sup>fl/fl</sup>* AOM-DSS by one-way ANOVA with Kruskal-Wallis test, followed by Mann-Whitney  $U$  test.

| Analyte                    | Concentration of Analyte (pg/mg protein); Mean $\pm$ S.E.M. |                   |                     |                                                |                   |                      |
|----------------------------|-------------------------------------------------------------|-------------------|---------------------|------------------------------------------------|-------------------|----------------------|
|                            | <i>Egfr<sup>fl/fl</sup></i>                                 |                   |                     | <i>Egfr<sup><math>\Delta</math>Glepi</sup></i> |                   |                      |
|                            | Control                                                     | Non-tumor         | AOM-DSS             | Control                                        | Non-tumor         | AOM-DSS              |
| CCL2                       | 9.67 $\pm$ 0.99                                             | 17.28 $\pm$ 2.81  | 110.7 $\pm$ 28.54** | 4.705 $\pm$ 0.90                               | 13.82 $\pm$ 4.94  | 144.2 $\pm$ 42.02### |
| CCL5                       | 15.08 $\pm$ 1.27                                            | 6.39 $\pm$ 0.95   | 4.75 $\pm$ 1.86     | 9.68 $\pm$ 1.47                                | 5.39 $\pm$ 1.33   | 4.57 $\pm$ 2.30      |
| CCL11                      | 136.9 $\pm$ 23.32                                           | 196.8 $\pm$ 22.02 | 202.4 $\pm$ 32.14   | 219.8 $\pm$ 26.30                              | 360.5 $\pm$ 100.7 | 504.0 $\pm$ 125.3    |
| CSF2                       | 1.30 $\pm$ 0.13                                             | 0.95 $\pm$ 0.42   | 19.19 $\pm$ 7.13**  | 0.31 $\pm$ 0.11                                | 0.45 $\pm$ 0.23   | 24.77 $\pm$ 8.90##   |
| CSF3                       | 6.86 $\pm$ 4.27                                             | 14.93 $\pm$ 3.66  | 254.3 $\pm$ 126.3** | 1.98 $\pm$ 0.32                                | 15.16 $\pm$ 5.50  | 262.8 $\pm$ 160.5##  |
| CXCL2                      | 26.10 $\pm$ 16.47                                           | 102.6 $\pm$ 87.36 | 1952 $\pm$ 727.4*** | 4.54 $\pm$ 0.92                                | 77.22 $\pm$ 53.77 | 2186 $\pm$ 625.3##   |
| CXCL5                      | 2.39 $\pm$ 0.19                                             | 5.95 $\pm$ 2.06   | 155.3 $\pm$ 34.67** | 2.28 $\pm$ 0.36                                | 4.46 $\pm$ 1.14   | 116.9 $\pm$ 46.21##  |
| IL-2                       | 0.72 $\pm$ 0.07                                             | 2.99 $\pm$ 2.17   | 7.32 $\pm$ 5.58     | 0.71 $\pm$ 0.11                                | 1.38 $\pm$ 0.68   | 12.13 $\pm$ 10.35    |
| IL-5                       | 0.62 $\pm$ 0.10                                             | 0.46 $\pm$ 0.06   | 1.01 $\pm$ 0.17     | 0.54 $\pm$ 0.15                                | 0.47 $\pm$ 0.12   | 0.83 $\pm$ 0.19      |
| IL-6                       | 6.15 $\pm$ 5.10                                             | 4.81 $\pm$ 1.16   | 490.3 $\pm$ 275.2*  | 0.67 $\pm$ 0.09                                | 8.56 $\pm$ 3.45   | 909.9 $\pm$ 517.9##  |
| IL-7                       | 2.27 $\pm$ 0.20                                             | 2.72 $\pm$ 0.39   | 3.06 $\pm$ 0.27     | 1.85 $\pm$ 0.13                                | 3.62 $\pm$ 1.53   | 2.53 $\pm$ 0.28      |
| IL-9                       | 26.01 $\pm$ 3.37                                            | 43.58 $\pm$ 9.70  | 72.24 $\pm$ 13.17*  | 21.40 $\pm$ 4.24                               | 29.28 $\pm$ 6.35  | 91.55 $\pm$ 25.81##  |
| IL-12B                     | 1.12 $\pm$ 0.41                                             | 0.16 $\pm$ 0.05   | 0.50 $\pm$ 0.31     | 0.39 $\pm$ 0.16                                | 0.12 $\pm$ 0.03   | 0.62 $\pm$ 0.39      |
| IL-13                      | 0.25 $\pm$ 0.20                                             | 1.14 $\pm$ 0.46   | 1.07 $\pm$ 0.28     | 0.06 $\pm$ 0.02                                | 1.22 $\pm$ 0.21   | 1.36 $\pm$ 0.14      |
| IL-15                      | 7.28 $\pm$ 0.27                                             | 2.58 $\pm$ 0.50   | 3.72 $\pm$ 0.67     | 5.67 $\pm$ 1.17                                | 2.15 $\pm$ 0.75   | 2.56 $\pm$ 0.67      |
| IL-17                      | 0.85 $\pm$ 0.43                                             | 2.89 $\pm$ 0.51   | 18.02 $\pm$ 3.36**  | 0.35 $\pm$ 0.09                                | 1.57 $\pm$ 0.66   | 11.70 $\pm$ 4.83##   |
| Not detected: IL-3, IL-12A |                                                             |                   |                     |                                                |                   |                      |

**Supplementary Table 2. Luminex analytes that did not demonstrate significant differences in colonic tissues from *Egfr<sup>fl/fl</sup>* and *Egfr <sup>$\Delta$ Glepi</sup>* mice.** A total of 32 distinct analytes were assessed in colonic tissues from control mice and from tumor and adjacent non-tumor tissue from mice treated with AOM-DSS. Listed are the analytes that were not significantly induced during AOM-DSS treatment or demonstrated few or no significant differences between genotypes.  $n = 5$  control and 6-9 non-tumor/tumor pairs per genotype. \* $P < 0.05$ , \*\* $P < 0.01$ , and \*\*\* $P < 0.001$  versus *Egfr<sup>fl/fl</sup>* control. ### $P < 0.01$  versus *Egfr <sup>$\Delta$ mye</sup>* control by one-way ANOVA with Kruskal-Wallis test, followed by Mann-Whitney  $U$  test.



| <b>Species</b> | <b>Target</b>  | <b>Sequence</b>            |
|----------------|----------------|----------------------------|
| Mouse          | <i>β-actin</i> | F: CCAGAGCAAGAGAGGTATCC    |
|                |                | R: CTGTGGTGGTGAAGCTGTAG    |
| Mouse          | <i>Nos2</i>    | F: CACCTTGGAGTTCACCCAGT    |
|                |                | R: ACCACTCGTACTTGGGATGC    |
| Mouse          | <i>Tnfa</i>    | F: CTGTGAAGGGAATGGGTGTT    |
|                |                | R: GGTCACTGTCCCAGCATCTT    |
| Mouse          | <i>Il1b</i>    | F: ACCTGCTGGTGTGTGACGTTCC  |
|                |                | R: GGGTCCGACAGCACGAGGCT    |
| Mouse          | <i>Arg1</i>    | F: AAGAAAAGGCCGATTACCT     |
|                |                | R: CACCTCCTCTGCTGTCTTCC    |
| Mouse          | <i>Chil3</i>   | F: ACTTTGATGGCCTCAACCTG    |
|                |                | R: AATGATTCCTGCTCCTGTGG    |
| Mouse          | <i>Il10</i>    | F: CCAAGCCTTATCGGAAATGA    |
|                |                | R: TCACTCTTCACCTGCTCCAC    |
| Mouse          | <i>Cxcl1</i>   | F: GCTGGGATTCACCTCAAGAA    |
|                |                | R: CTTGGGGACACCTTTTAGCA    |
| Mouse          | <i>Vegfa</i>   | F: GAGGATGTCCTCACTCGGATG   |
|                |                | R: GTCGTGTTTCTGGAAGTGAGCAA |

**Supplementary Table 3.** List of primers used for qRT-PCR.

| <b>Antibody</b>                       | <b>Dilution</b>  | <b>Application</b> | <b>Source (Location)</b>                                          |
|---------------------------------------|------------------|--------------------|-------------------------------------------------------------------|
| Rabbit polyclonal anti-pEGFR Y1068    | Pre-diluted      | IHC-P<br>IF        | Biocare Medical (Concord, CA)<br>Cat. No. API 300                 |
| Rabbit polyclonal anti-tEGFR          | 1:3,000<br>1:100 | WB<br>IF           | Cell Signaling (Danvers, MA)<br>Cat. No. 2232                     |
| Rat monoclonal anti-CD31              | 1:100            | IHC-P              | Dianova (Hamburg Germany)<br>Cat. No. DIA 310                     |
| Mouse monoclonal anti- $\beta$ -actin | 1:10,000         | WB                 | Sigma-Aldrich (St. Louis, MO)<br>Cat. No. A1978                   |
| Goat anti-mouse IgG, HRP labeled      | 1:30,000         | WB                 | Jackson ImmunoResearch (St. Louis, MO) Cat.<br>No. 115-035-003    |
| Goat anti-rabbit IgG, HRP labeled     | 1:3,000          | WB                 | Jackson ImmunoResearch (St. Louis, MO) Cat.<br>No. 115-035-003    |
| Mouse monoclonal anti-CD68            | Pre-diluted      | IF                 | Biocare Medical (Concord, CA)<br>Cat. No. PM033AA                 |
| Goat anti-mouse IgG, Alexa555         | 1:500            | IF                 | Life Technologies (Carlsbad, CA)<br>Cat. No. A31570               |
| Goat anti-rabbit IgG, Alexa488        | 1:500            | IF                 | Jackson ImmunoResearch (St. Louis, MO)<br>Cat. No. 111-095-003    |
| Rabbit HRP Polymer                    | Pre-diluted      | IF/IHC-P*          | Biocare Medical (Concord, CA)<br>Cat. No. RHRP520                 |
| Donkey anti-HRP, FITC                 | 1:400            | IF                 | Jackson ImmunoResearch (St. Louis, MO)<br>Cat. No. 123-545-021    |
| Rabbit anti-rat IgG, biotinylated     | 1:200            | IHC-P**            | Vector Laboratories (Burlingame, CA)<br>Cat. No. BA-4000          |
| Goat anti-rabbit IgG, biotinylated    | 1:400            | IHC-P***           | Vector Laboratories (Burlingame, CA)<br>Cat. No. BA-1000          |
| Rabbit polyclonal anti-CD68           | 1:200            | IHC-P              | Boster Biological Technology (Pleasanton, CA)<br>Cat. No. PA-1518 |
| Rabbit polyclonal anti-MPO            | Pre-diluted      | IHC-P              | Biocare Medical (Concord, CA)<br>Cat. No. PP-023-AA               |
| Rabbit monoclonal anti-CD3            | 1:250            | IHC-P              | Abcam (Cambridge, MA)<br>Cat. No. ab16669                         |
| Rat monoclonal anti-CD45R             | 1:30,000         | IHC-P              | BD Pharmingen (San Jose, CA)<br>Cat. No. 553084                   |
| Rabbit polyclonal anti-pSTAT6 Y941    | 1:100            | IHC-P              | Lifespan Biosciences, Inc. (Seattle, WA)<br>Cat. No. LS-C117487   |

**Supplementary Table 4.** List of all antibodies used for this study, including the dilution, application and company/catalog number from which the antibodies were purchased. WB = western blotting, IF = immunofluorescence, IHC-P = immunohistochemistry-immunoperoxidase. \* = used for CD68, MPO, and pSTAT6 IHC-P. \*\* = used for CD45R and CD31 IHC-P. \*\*\* = used for CD3 IHC-P.

| Figure | Panel | <i>P</i> value                                                          | Figure | Panel | <i>P</i> value                                                          |
|--------|-------|-------------------------------------------------------------------------|--------|-------|-------------------------------------------------------------------------|
| 1      | b     | = 0.002                                                                 | S5     | a     | CCL3: = 0.0005<br>CCL4: = 0.0003<br>CXCL9: = 0.0003<br>CXCL10: = 0.0011 |
| 1      | c     | = 0.008                                                                 | S5     | b     | < 0.0001                                                                |
| 2      | a     | < 0.0001                                                                | S5     | c     | CSF1: = 0.0003<br>IL-1 $\alpha$ : = 0.0011                              |
| 2      | b     | < 0.0001                                                                | S6     | a     | IL-4: = 0.0202<br>IL-10: = 0.05                                         |
| 2      | d     | < 0.0001                                                                | S6     | b     | <i>Arg1</i> : 0.0012<br><i>Il10</i> : = 0.0049                          |
| 3      | a     | CCL3: = 0.0005<br>CCL4: = 0.0003<br>CXCL9: = 0.0003<br>CXCL10: = 0.0011 | S7     | a     | < 0.0001                                                                |
| 3      | b     | < 0.0001                                                                | S7     | b     | <i>Nos2</i> : = 0.0002<br><i>Il1b</i> : = 0.0002                        |
| 3      | c     | CSF1: = 0.0003<br>IL-1 $\alpha$ : = 0.0011                              | S7     | c     | = 0.0004                                                                |
| 5      | a     | IFN- $\gamma$ : = 0.0079<br>TNF- $\alpha$ : < 0.0001                    | S8     | a     | = 0.0002                                                                |
| 5      | b     | <i>Nos2</i> : < 0.0001<br><i>Il1b</i> : < 0.0001                        | S8     | b     | < 0.0001                                                                |
| 5      | c     | = 0.0004                                                                |        |       |                                                                         |
| 6      | a     | IL-4: = 0.002<br>IL-10: = 0.04<br>IL-13: = 0.0049                       |        |       |                                                                         |
| 6      | b     | <i>Arg1</i> : < 0.0001<br><i>Il10</i> : = 0.0032                        |        |       |                                                                         |
| 7      | a     | <i>Cxcl1</i> : < 0.0001<br><i>Vegfa</i> : = 0.05                        |        |       |                                                                         |
| 7      | b     | CXCL1: < 0.0001<br>VEGF: = 0.0095                                       |        |       |                                                                         |

**Supplementary Table 5.** List of all *P* values derived from Kruskal-Wallis testing. S = supplementary figure.
